# Supplementary material for: Determinants of institutional birth among women in rural Nepal: a mixed-methods cross-sectional study
Source: PubMed Central journal article supplement (PMC5002328; doi:10.1186/s12884-016-1022-9), 2016-08-27
Supplement: 12884_2016_1022_MOESM1_ESM.pdf [file 12884_2016_1022_MOESM1_ESM.pdf]

INTERVIEWER NAME: \_\_\_\_\_

**DEMOGRAPHIC INFORMATION**

1. **How old are you?**  
\_\_\_\_\_ years
2. **Where do you live?**  
District: \_\_\_\_\_  
VDC: \_\_\_\_\_ Ward: \_\_\_\_\_  
Distance to Bayalpata Hospital: \_\_\_\_\_ hours
3. **What is your caste?**  
 Dalit  
 Brahmin  
 Kshetrya  
 Vaishya  
 Any other caste
4. **How much money does the household make on average per month? \_\_\_\_\_ NRs**
5. **How many ropani land does your household own?**  
\_\_\_\_\_ ropani
6. **What is the highest level of education you have completed? (Please choose only one.)**  
 Illiterate  
 Literate, no formal schooling  
 Literate, schooling up to primary only  
 Literate, schooling through secondary+
7. **How many times have you been pregnant, including abortion, miscarriage, cesarean section?**  
\_\_\_\_\_ times
8. **How many vaginal deliveries have you had? (including most recent)**  
\_\_\_\_\_ vaginal deliveries
9. **How many cesarean sections have you had?**  
\_\_\_\_\_ cesarean sections
10. **How many living children?**  
\_\_\_\_\_ sons \_\_\_\_\_ daughters
11. **How many antenatal care visits in this pregnancy (0=none)?**  
\_\_\_\_\_ visits
12. **If so, location of antenatal care:**  
 Health post  
 Hospital  
 Private clinic

**DECIDING TO SEEK CARE**

13. **Where did you deliver your baby?**  
 Home/House/Friend's;VDC \_\_\_\_\_  
 Health post; Name \_\_\_\_\_

- Hospital; Name \_\_\_\_\_
- Private clinic; Name \_\_\_\_\_
- Other: \_\_\_\_\_

14. **Who made the decision about location of delivery?**  
 Self  
 Husband  
 Other male relative/in-law/friend  
 Other female relative/in-law/friend  
 I don't know/Other \_\_\_\_\_
15. **What were the most important factors in making this decision? Do not give options; tick all that she mentions**  
 Cost of care  
 Safety  
 Distance  
 Availability of c-section/blood transfusion  
 Treatment by medical staff  
 Financial incentive  
 Privacy  
 Space  
 I don't know/Other \_\_\_\_\_
16. **What symptoms or conditions prompted you to seek care (select all that apply)?**  
 Contractions/Knew I was to deliver  
 Bleeding  
 Pain not related to contractions  
 Previous complicated pregnancies  
 Concern for my health  
 Partner/spouse/family encouragement/suggestion
17. **Do you feel that it is safer to deliver at home or in the hospital?**  
 Home  
 Hospital  
 Same  
 I don't know/Other \_\_\_\_\_
18. **Are cesarean section services offered at Bayalpata Hospital?**  
 Yes  
 No  
 I don't know/Other \_\_\_\_\_
19. **Are blood transfusion services offered at Bayalpata Hospital?**  
 Yes  
 No  
 I don't know/Other \_\_\_\_\_

**20. Did you know prior to your delivery about whether cesarean section and blood transfusion services are offered at Bayalpata Hospital?**

- Yes
- No
- I don't know/Other \_\_\_\_\_

**21. If yes, how did you know?**

- Antenatal clinic
- Doctor/health care worker
- Word of mouth
- Community health worker
- Radio announcement
- I don't know/Other \_\_\_\_\_

**22. If yes, did this affect your decision on where to deliver?**

- Yes
- No

**23. Where do you plan to deliver in the future if you become pregnant again?**

- Home
- Health post
- Hospital
- Private clinic
- I don't know/Other \_\_\_\_\_

**ACCESSING CARE**

**24. Where were you immediately prior to delivery?**

- Home
- Health post
- Hospital
- Private clinic
- I don't know/Other \_\_\_\_\_

**25. During your pregnancy, did you change your home location in preparation for delivery?**

- Yes; Distance from home: \_\_\_\_\_ hours;  
Location name: \_\_\_\_\_  
Why? \_\_\_\_\_
- No

**26. How long did it take to get to where you delivered?  
\_\_\_\_\_ Hours**

**27. What did it cost to travel to where you delivered?  
\_\_\_\_\_/Rs.**

**28. How much did you pay to deliver your baby?  
\_\_\_\_\_/Rs.**

**29. Did you/will you receive the government financial incentive for delivering your baby where you did?**

- Yes

- No
- I don't know/Other \_\_\_\_\_

**30. Was travel a factor for where you delivered?**

- Major Barrier
- Minor Barrier
- No Barrier
- I don't know/Other

**31. Was high cost factor for where you delivered?**

- Major Barrier
- Minor Barrier
- No Barrier
- I don't know/Other

**32. How can the hospital make it easier for you to arrive to the hospital and receive services?**

\_\_\_\_\_

\_\_\_\_\_

**QUALITY OF CARE RECEIVED**

**33. What do you think is required for a safe delivery?**

\_\_\_\_\_

\_\_\_\_\_

**34. Was lack of privacy factor for where you delivered?**

- Major Barrier
- Minor Barrier
- No Barrier
- I don't know/Other

**35. Was concern about treatment by medical staff a factor for where you delivered?**

- Major Barrier
- Minor Barrier
- No Barrier
- I don't know/Other

**36. What service did you receive at where you delivered (all that apply)?**

- Vaginal delivery
- Cesarean section
- Manual removal placenta
- Postpartum hemorrhage treatment
- Suture of laceration
- Blood transfusion
- Treatment for eclampsia
- I don't know/Other \_\_\_\_\_

**37. Did where you deliver have adequate staff to provide you a safe delivery?**

- Completely adequate
- Somewhat adequate, why? \_\_\_\_\_

- Not adequate, why? \_\_\_\_\_
- I don't know/Other \_\_\_\_\_

**38. Did where you deliver have adequate supplies to provide you a safe delivery?**

- Completely adequate
- Somewhat adequate, why? \_\_\_\_\_
- Not adequate, why? \_\_\_\_\_
- I don't know/Other \_\_\_\_\_

**39. Did where you deliver have adequate space to provide you a safe delivery?**

- Completely adequate
- Somewhat adequate, why? \_\_\_\_\_
- Not adequate, why? \_\_\_\_\_
- I don't know/Other \_\_\_\_\_

**40. What was lacking at the place of delivery during your delivery?**

\_\_\_\_\_  
\_\_\_\_\_

**41. Were you satisfied with the care that you received for your delivery?**

- Completely satisfied
- Mostly satisfied, why? \_\_\_\_\_
- Mostly dissatisfied, why? \_\_\_\_\_
- Completely dissatisfied, why? \_\_\_\_\_
- I don't know/Other \_\_\_\_\_

**42. Were you satisfied with immediate post-partum care you received?**

- Completely satisfied
- Mostly satisfied, why? \_\_\_\_\_
- Mostly dissatisfied, why? \_\_\_\_\_
- Completely dissatisfied, why? \_\_\_\_\_
- I don't know/Other \_\_\_\_\_

**POSTPARTUM CONTRACEPTION**

**43. Did you/will you receive a method of family planning or contraception after delivery**

- Yes
- No
- I don't know

**44. If so, what method?**

- Condoms
- Depo
- IUD
- Norplant
- Tubal ligation
- OCP/Pills
- None/I don't know/ Other: \_\_\_\_\_

**MALE FAMILY MEMBER SURVEY**

**45. Where is the father of your infant?**

- Working; in Achham
- Working; not in Achham
- Separated
- Not living
- I don't know/Other \_\_\_\_\_

**46. Do you feel comfortable letting us speak to a male decision maker in your household who is present today to ask them some similar questions?**

- Yes
- No

**THANK YOU!**

- NRs. 100 given

INTERVIEWER NAME: \_\_\_\_\_

**DEMOGRAPHIC INFORMATION**

**1. What is your relationship to the woman who delivered?**

- Husband/Partner
- Father
- Father-in-law
- Other male relative
- Other male-in-law
- Non-related/non-in-law friend

**2. How old are you?**

\_\_\_\_\_years

**3. What is your caste?**

- Dalit
- Brahmin
- Kshetrya
- Vaishya
- Any other caste

**4. What is the highest level of education you have completed? (Please choose only one.)**

- Illiterate
- Literate, no formal schooling
- Literate, schooling up to primary only
- Literate, schooling through secondary+

**DECIDING TO SEEK CARE**

**5. Who made the decision for her to deliver at that location?**

- Woman herself
- Husband
- Other male relative/in-law/friend
- Other female relative/in-law/friend
- I don't know/Other \_\_\_\_\_

**6. What were the most important factors in making this decision? Do not give options; tick all that she mentions**

- Cost of care
- Safety
- Distance
- Availability of c-section/blood transfusion
- Treatment by medical staff
- Financial incentive
- Privacy
- Space
- I don't know/Other \_\_\_\_\_

**7. Do you feel that it is safer to deliver at home or in the hospital?**

- Home
- Hospital
- Same
- I don't know/Other \_\_\_\_\_

**8. Did you know prior to her delivery about whether cesarean section and blood transfusion services are offered at Bayalpata Hospital?**

- Yes
- No
- I don't know/Other \_\_\_\_\_

**9. If yes, how did you know?**

- Antenatal clinic
- Doctor/health care worker
- Word of mouth
- Community health worker
- Radio announcement
- I don't know/Other \_\_\_\_\_

**10. If yes, did this affect the decision on where to deliver?**

- Yes
- No

**11. Are cesarean section services offered at Bayalpata Hospital?**

- Yes
- No
- I don't know/Other \_\_\_\_\_

**12. Are blood transfusion services offered at Bayalpata Hospital?**

- Yes
- No
- I don't know/Other \_\_\_\_\_

**13. Where do you think she should deliver in the future if she becomes pregnant again?**

- Home
- Health post
- Hospital
- Private clinic
- I don't know/Other \_\_\_\_\_

**ACCESSING CARE**

**14. Was travel a factor for where she delivered?**

- Major Barrier
- Minor Barrier
- No Barrier
- I don't know/Other \_\_\_\_\_

**15. Was high cost a factor for where she delivered?**

- Major Barrier
- Minor Barrier
- No Barrier
- I don't know/Other

**16. How can the hospital make it easier for her to arrive to the Hospital and receive services?**

\_\_\_\_\_  
\_\_\_\_\_

**QUALITY OF CARE RECEIVED**

**17. What do you think is required for a safe delivery?**

\_\_\_\_\_  
\_\_\_\_\_

**18. Was lack of privacy a factor for where she delivered?**

- Major Barrier
- Minor Barrier
- No Barrier
- I don't know/Other

**19. Was concern about treatment by medical staff a factor for where she delivered?**

- Major Barrier
- Minor Barrier
- No Barrier
- I don't know/Other

**20. Did where she delivered have adequate staff to provide her a safe delivery?**

- Completely adequate
- Somewhat adequate, why? \_\_\_\_\_
- Not adequate, why? \_\_\_\_\_
- I don't know/Other \_\_\_\_\_

**21. Did where she delivered have adequate supplies to provide you a safe delivery?**

- Completely adequate
- Somewhat adequate, why? \_\_\_\_\_
- Not adequate, why? \_\_\_\_\_
- I don't know/Other \_\_\_\_\_

**22. Did where she delivered have adequate space to provide you a safe delivery?**

- Completely adequate
- Somewhat adequate, why? \_\_\_\_\_
- Not adequate, why? \_\_\_\_\_
- I don't know/Other \_\_\_\_\_

**23. What was lacking at the place of delivery during her delivery?**

\_\_\_\_\_  
\_\_\_\_\_

**24. Were you satisfied with the care that you received for her delivery?**

- Completely satisfied
- Mostly satisfied, why? \_\_\_\_\_
- Mostly dissatisfied, why? \_\_\_\_\_
- Completely dissatisfied, why? \_\_\_\_\_
- I don't know/Other \_\_\_\_\_

**25. Were you satisfied with immediate post-partum care she received?**

- Completely satisfied
- Mostly satisfied, why? \_\_\_\_\_
- Mostly dissatisfied, why? \_\_\_\_\_
- Completely dissatisfied, why? \_\_\_\_\_
- I don't know/Other \_\_\_\_\_

**THANK YOU FOR YOUR PARTICIPATION!**

## मिति

अन्तरवार्ता लिनेको नाम: \_\_\_\_\_

तपाईंले बच्चा जन्माउदा खेरीको कथा भन्नुहोस् । के कस्ता योजनाहरु गर्नुभएको थियो, के भयो र कस्तो महसुस गर्नुभयो ।

## जनसांख्यिकी सूचना

1. तपाईं कति वर्षको हुनु भयो?  
\_\_\_\_\_ वर्ष
2. तपाईं कहाँ बस्नु हुन्छ?  
जिल्ला : \_\_\_\_\_  
गा.वि.स.: \_\_\_\_\_ वडा नं.: \_\_\_\_\_  
तपाइको घर देखी ब्यालपाटा अस्पताल आउन कति समय लाग्छ ? \_\_\_\_\_ घण्टा
3. तपाईं को जात के हो ?  
 दलीत  
 ब्रामण  
 क्षेत्री  
 वैश्य  
 अन्य
4. तपाईंको पविवारले महिनामा कति आम्दानी गर्नुहुन्छ ?  
रु \_\_\_\_\_
5. तपाईं संग जम्मा कती रोपनि जमीन छ ?  
\_\_\_\_\_ रोपनि
6. तपाईंले कति पढ्नु भएको छ ? (कुनै एक उत्तर छान्नुहोस् )  
 अशिक्षित  
 साधारण लेखपढ  
 शिक्षित, प्रा.वि.सम्म  
 शिक्षित, मा.वि.+
7. गर्भपात, गर्भपतन तथा अन्य लगायत तपाईं कती पटक गर्भवति हुनु भएको छ ?  
\_\_\_\_\_ पटक
8. तपाईंले कति बच्चा घरैमा जन्माउनु भयो ?  
\_\_\_\_\_ पटक

9. तपाईंले अस्पतालमा कती बच्चा जन्माउनुभयो ?  
\_\_\_\_\_ पटक
10. अपरेशन गरेर तपाईंले कति पटक सुत्केरी गराउनु भयो ?  
\_\_\_\_\_ पटक
11. तपाईंका कती वटा बच्चाहरु छन् ?  
\_\_\_\_\_ छोरा \_\_\_\_\_ छोरी
12. गर्भवति अवस्थामा तपाईंले कती पटक चेक जाँच गराउनु भयो ?  
\_\_\_\_\_ पटक

(यदि '0' उत्तर आएमा प्रश्न नं. १४ मा जानु)

13. यदि चेक जाँच गराउनु भयो भने तलका मध्ये कहाँ गराउनु भयो ?  
 स्वास्थ्य चौकी  
 अस्पताल  
 निजी क्लिनिक

## DECIDING TO SEEK CARE

14. तपाईं ले अन्तिम बच्चा कहाँ पाउनु भयो ?  
 घर/नातेदारको/ साथीको घर, गा.वि.स. \_\_\_\_\_  
 स्वास्थ्य चौकी ; नाम \_\_\_\_\_  
 अस्पताल; नाम \_\_\_\_\_  
 निजी क्लिनिक; नाम \_\_\_\_\_  
 अन्य: \_\_\_\_\_
15. तपाईंले अन्तिम बच्चा कहाँ पाउने भनने निर्णय कसले गरेको थियो ?  
 आफै  
 श्रीमान्  
 ससुराबा/ अन्य पुरुष नातेदार/ साथी  
 सासुआमा/ अन्य महिला नातेदार/ साथी  
 पूरै परिवार  
 छै/अन्य \_\_\_\_\_
16. माथिको निर्णय लिनमा तलमध्येका कुन तत्वले महत्वपूर्ण भूमिका खेलेको थियो ? (एक भन्दा बढी उत्तरमा टिक लगाउन मिल्छ)  
 उपचार मुल्य  
 सुरक्षा/राम्रो सेवा  
 दुरी/सवारी साधन  
 शल्यक्रिया तथा रगत दिने सुविधा  
 स्वास्थ्यकर्मीको कमी  
 आर्थिक सुविधा  
 गोपनीयता/ठाउ  
 छै/अन्य \_\_\_\_\_
17. तपाईंले गर्भ वा सुत्केरी हुने बेलामा केहि समस्या परेर डाक्टर कहाँ जानु भएको थियो ? (यदि थिएन भने प्र.नं. १८ मा जानु) तपाईं डाक्टर कहाँ के भएपछि जानुभयो (मिल्ने जति उत्तरमा ठिक चिन्ह लगाउनुहोस् )  
 तल्लो पेटको दुखाइले  
 रगत बगीरहेकोले

- तल्लो पेटबाहेक अन्य दुखाइले
- अधिल्लो पटक सुत्केरी हुँदा गाह्रो भएकोले
- आफ्नो स्वास्थ्यलाई ख्याल गरेर
- लामो व्यथा
- अरुको सल्लाहा सुभावा
- अन्य

## 18. तलका मध्ये तपाईं सुत्केरी हुन कहाँ सुरक्षित ठान्नुहुन्छ ?

- अस्पतालमा
- अन्य \_\_\_\_\_
- थाहा छैन

## 19. के तपाईंलाई थाहा छ वयालपाटा अस्पतालमा शल्यक्रियाको सुविधा छ भनेर ?

- छ
- छैन
- खै/अन्य \_\_\_\_\_

## 20. के तपाईंलाई थाहा छ वयालपाटा अस्पतालमा रगत दिने सुविधा छ भनेर ?

- छ
- छैन
- थाहाछैन \_\_\_\_\_

(यदि घरमा अन्तिम बच्चा जन्माएको भए प्रश्न नं. २२ मा जानु)

## 21. प्रसूती हुनु पूर्व के तपाईंलाई वयालपाटा अस्पतालमा शल्यक्रिया तथा रगत दिने सुविधा छ की छैन भनेर थाहा थियो

- थियो
- थिएन \_\_\_\_\_ प्रश्न नं २२ मा जानुहोस् ।
- खै/अन्य \_\_\_\_\_ प्रश्न नं २२ मा जानुहोस् ।

## a. यदि थाहा थियो भने कहाँ वाट थाहा पाउनुभयो ?

- गर्भजाँच
- डाक्टर/स्वास्थ्य सेवक
- अरु कसैले भनेर
- सामुदायिक स्वास्थ्य कार्यकर्ता
- रेडीयोवाट
- खै/ अन्य \_\_\_\_\_

## b. यदि थाहा थियो भने प्रसूती कहाँ गर्ने निर्णय गर्दा त्यसले फरक पायो ?

- पायो
- पारेन

## 22. यदि तपाईं फेरी गर्भवति हुनु भयो भने तपाईं प्रसूती कहाँ हुने चाहाना राख्नुहुन्छ ?

- घरमा
- स्वास्थ्य चौकी
- अस्पताल
- निजी क्लिनिक
- खै/अन्य \_\_\_\_\_

## ACCESSING CARE

## 23. तपाईं सुत्केरी हुनु अगाडि कहाँ हुनुहुन्थ्यो?

- घरमा
- स्वास्थ्य चौकी
- अस्पतालमा
- निजी क्लिनिकमा
- खै/थाहा छैन \_\_\_\_\_

## 24. तपाईंले सुत्केरी गराउन सजिलो होस् भनेर बस्ने ठाँउ सर्नुभएको थियो ?

- थिए
- घर वाट दुरी : \_\_\_\_\_ घण्टा, \_\_\_\_\_

ठाउको नाम : \_\_\_\_\_

बस्ने ठाँउ किन परिवर्तन गर्नु भयो ? \_\_\_\_\_

- थिएन

## 25. सुत्केरी गराउने ठाउ सम्म पुग्न तपाईंलाई कति घण्टा लाग्यो ? \_\_\_\_\_ घण्टा (घरमै जन्माएको भए ० लेख्ने)

(यदि घरमा अन्तिम बच्चा जन्माएको भए प्रश्न नं. ३० मा जानु)

## 26. तपाइ प्रसूती हुने ठाउ सम्म कसरी पुगनु भयो ?

- हिडेर
- सवारी साधन वाट
- एम्बुलेन्स वाट
- अन्य

(यदि 'हिडेर वा अन्य' भन्ने उत्तर आएमा प्रश्न नं. २८ मा जानु)

## 27. प्रसूती हुने ठाउ जान कति रुपैया लाग्यो ?

रु \_\_\_\_\_

## 28. तपाइले प्रसूती भए वाफत कति पैसा तिर्नु भयो ?

रु \_\_\_\_\_

## 29. तपाइ प्रसूती भएपछि सरकारी प्रोत्साहन रकम पाउनु भयो ?

- पाए
- पाएन
- खै / थाहा छैन \_\_\_\_\_

## 30. तपाइ प्रसूती कहाँ हुने निर्णय लिनको लागी यातायात बाधक भएको थियो ?

- मुख्य बाधक
- सामान्य बाधक
- बाधक थिएन
- खै/थाहा छैन

## 31. तपाइ प्रसूती कहाँ हुने निर्णय लिनको लागी पैसा बाधक भएको थियो

- मुख्य बाधक
- सामान्य बाधक
- बाधक थिएन

खैथहा छैन

32. अस्पताल आइ सेवा लीनको लागी अस्पतालले कसरी सजिलो पार्न सकिन्छ ?

- एम्बुलेन्सको सेवा अझ बढी राम्रो बनाउने।  
 एम्बुलेन्सको शुल्क घटाउने।  
 अस्पतालको कर्मचारीलाई सुलभ रूपले कुरा गर्न पाउनु परयो।  
 स्वयम सेविका संगै आउनु परयो।  
 अन्य \_\_\_\_\_

#### QUALITY OF CARE RECEIVED

33. तपाइलाई सुरक्षीत प्रसुतीसेवा को लागी कुन कुरा आवश्यक जस्तो लाग्छ।

\_\_\_\_\_

\_\_\_\_\_

34. तपाइ प्रसुती कहाँ हुने निर्णय लिनको लागी गोपनियता एउटा कारण थियो।

- मुख्य बाधक  
 सामान्य बाधक  
 बाधक थिएन  
 खैथहा छैन

35. तपाइ प्रसुती कहाँ हुने निर्णय लिनको लागी सेवा दिन डाक्टर छ की छैन भनेर बाधक भएको थियो

- मुख्य बाधक  
 सामान्य बाधक  
 बाधक थिएन  
 खैथहा छैन

(यदि घरमा अन्तिम बच्चा जन्माएको भए प्रश्न नं. ३८ मा जानु)

36. तपाइ प्रसुती भएको ठाउमा के कस्ता सेवा पाउनु भयो।

- साधारण प्रसुती  
 शल्यक्रिया प्रसुती  
 हात हालेर साल निकाल्ने  
 सुत्केरी अवस्थामा हुने रक्तश्रापको उपचार  
 च्यातीएको ठाउमा सिलाउने  
 रगत दिने  
 कम्पनको उचार  
 खैथहा छैन \_\_\_\_\_

37. तपाइलाई सुरक्षीत प्रसुती सेवा दिनको लागी तपाइ प्रसुती भएको ठाउमा प्रयाप्त कर्मचारी थिए।

- प्रयाप्त  
 प्रयाप्त थिएन किन \_\_\_\_\_  
 खैथहा छैन \_\_\_\_\_

38. तपाइलाई सुरक्षीत प्रसुती सेवा दिनको लागी तपाइ प्रसुती भएको ठाउमा प्रयाप्त आवश्यक सामग्री थिए।

प्रयाप्त

प्रयाप्त थिएन किन \_\_\_\_\_

खैथहा छैन \_\_\_\_\_

39. तपाइलाई सुरक्षीत प्रसुती सेवा दिनको लागी तपाइ प्रसुती भएको ठाउमा प्रयाप्त आवश्यक ठाउ थियो

- प्रयाप्त  
 प्रयाप्त थिएन किन \_\_\_\_\_  
 खैथहा छैन \_\_\_\_\_

40. तपाइ प्रसुती भएको वेला तपाइ लाइ केही कुराको कमी थियो जस्तो लाग्छ।

- गोपनियताको कमी  
 दक्ष जनशक्ति को कमी(डाक्टर,नर्स)  
 सफा ठाउ थिएन  
 आवश्यक खाट थिएन।  
 अन्य \_\_\_\_\_  
 केही पनि नाई

41. तपाइले पाएको प्रसुती सेवामा के तपाइ सन्तुष्टी हुनुहुन्छ।

- सन्तुष्टी  
 असन्तुष्टी किन \_\_\_\_\_  
 खैथहा छैन \_\_\_\_\_

(यदि घरमा अन्तिम बच्चा जन्माएको भए प्रश्न नं. ४३ मा जानु)

42. तपाइले पाएको तुरुन्त सुत्केरी सेवामा के तपाइ सन्तुष्टी हुनुहुन्छ।

- सन्तुष्टी  
 असन्तुष्टी किन \_\_\_\_\_  
 खैथहा छैन \_\_\_\_\_

#### POSTPARTUM CONTRACEPTION

43. सुत्केरी पश्चात तपाइले कुनै परिवार नियोजनका साधनहरु प्रयोग गर्नुभएको छ।

- छ  
 छैन  
 खै

(यदि 'छैन वा खै' भन्ने उत्तर आएमा अन्तरवार्ता सकियो)

44. यदि प्रयोग गर्नु भएको छ भने तलका मध्ये कुन साधन प्रयोग गर्नुभएको छ।

- कन्डम  
 डिपो  
 आयुडी  
 नरपलान्ट  
 मिनी ल्याप  
 पिल्स  
 अन्य : \_\_\_\_\_

धन्यवाद THANK YOU!

NRs. 100 given



Date \_\_\_\_\_

अन्तरवार्ता लिनेको नाम INTERVIEWER NAME:  
\_\_\_\_\_

## जनसांख्यिकी सूचना DEMOGRAPHIC INFORMATION

## 1. What is your relationship to the woman who delivered?

- Husband/Partner  
 Father  
 Father-in-law  
 Other male relative  
 Other male-in-law  
 Non-related/non-in-law friend

## 2. तपाईं कति वर्षको हुनु भयो? How old are you?

\_\_\_\_\_ वर्ष years

## 3. तपाईं को जात के हो ? What is your caste?

- दलीत Dalit  
 ब्रामण Brahmin  
 क्षत्री Kshetrya  
 वैश्य Vaishya  
 अन्य Any other caste

## 4. तपाईंले कति पढ्नु भएको छ ? What is the highest level of education you have completed? (Please choose only one.)

- अशिक्षित Illiterate  
 साधारण लेखपढ Literate, no formal schooling  
 शिक्षित, प्रा. वि. सम्म Literate, schooling through primary  
 शिक्षित, मा. वि+ Literate, schooling through secondary+

## DECIDING TO SEEK CARE

## 5. तपाईंले बच्चा कहाँ पाउने भन्ने निर्णय कसले गरेको थियो ? Who made the decision about location of delivery?

- आफै Self  
 श्रीमान Husband  
 ससुराबा/साथी Other male relative/in-law/friend  
 सासुआमा/साथी Other female relative/in-law/friend  
 Whole family  
 खैअन्य I don't know/Other \_\_\_\_\_

## 6. माथिको निर्णय लिनमा तलमध्येका कुन तत्वले महत्वपूर्ण भूमिका खेलेको थियो ? Why did you deliver where you did?

**Check all that apply**

- उपचार मुल्य High cost of care  
 सुरक्षा Safety/Good care  
 दुरी Long distance/Transportation  
 शल्यक्रिया तथा रगत दिने सुविधा Availability of c-section/blood transfusion/other special services  
 Lack of medical staff

- आर्थिक सुविधा Financial incentive  
 गोपनीयता/ठाउ Privacy/Space  
 खैअन्य I don't know/Other \_\_\_\_\_

## 7. तलका मध्ये तपाईं सुत्केरी हुन कहाँ सुरक्षित ठान्नुहुन्छ ? Do you feel that it is safer to deliver at home or in the hospital?

- घरमा Home  
 अस्पतालमा Hospital  
 Same  
 अन्याथाहा छैन I don't know/Other \_\_\_\_\_

## 8. के तपाइलाइ थाहा छ बयालपाटा अस्पतालमा शल्यक्रियाको सुविधा छ भनेर ? Are cesarean section services offered at Bayalpata Hospital?

- छ Yes  
 छैन No  
 खैअन्य I don't know/Other \_\_\_\_\_

## 9. के तपाइलाइ थाहा छ बयालपाटा अस्पतालमा रगत दिने सुविधा छ भनेर Are blood transfusion services offered at Bayalpata Hospital?

- छ Yes  
 छैन No  
 थाहाछैन I don't know/Other \_\_\_\_\_

## 10. प्रसूती हुनु पूर्व के तपाइलाइ बयालपाटा अस्पतालमा शल्यक्रिया तथा रगत दिने सुविधा छ की छैन भनेर थाहा थियो Did you know prior to your delivery about whether cesarean section and blood transfusion services are offered at Bayalpata Hospital?

- थियो Yes  
 थिएन No  
 खैअन्य I don't know/Other \_\_\_\_\_

## a. यदि थाहा थियो भने कहाँ बाट थाहापाउनुभयो If yes, how did you know?

- गर्भजाँच Antenatal clinic  
 डाक्टरास्वास्थ्य सेवक Doctor/health care worker  
 अरु कसैले भनेर Word of mouth  
 सामुदायीक स्वास्थ्य कार्यकर्ता Community health worker  
 रेडीयोबाट Radio announcement  
 खैअन्य I don't know/Other \_\_\_\_\_

## b. यदि थाहा थियो भने प्रसूती कहाँ गर्ने निर्णय गर्दा त्यसले फरक पा-या If yes, did this affect your decision on where to deliver?

- Yesपा-यो  
 Noपारेन

## 11. यदि तपाईं फेरी गर्भवति हुनु भयो भने तपाईं प्रसूती कहाँ हुने चाहाना राख्नुहुन्छ ? Where do you plan to deliver in the future if you become pregnant again?

- घरमा Home  
 स्वास्थ्य चौकी Health post  
 अस्पताल Hospital  
 निजी क्लिनिक Private clinic  
 खैअन्य I don't know/Other \_\_\_\_\_ खैअन्य

**ACCESSING CARE**

12. तपाइ प्रसुती कहाँ हुने निर्णय लिनको लागि यातायात बाधक भएको थियो। **Was travel a factor for where you delivered?**

- मुख्य बाधक Major Barrier  
 सामान्य बाधक Minor Barrier  
 बाधक थिएन No Barrier  
 खैअन्य छैन I don't know/Other \_\_\_\_\_

13. तपाइ प्रसुती कहाँ हुने निर्णय लिनको लागि पैसा बाधक भएको थियो **Was high cost factor for where you delivered?**

- मुख्य बाधक Major Barrier  
 सामान्य बाधक Minor Barrier  
 बाधक थिएन No Barrier  
 खैअन्य छैन I don't know/Other \_\_\_\_\_

14. अस्पताल आइ सेवा लिनको लागि अस्पतालले कसरी सजिलो पार्न सक्छ। **How can the hospital make it easier for you to arrive to the hospital and receive services?**

- एम्बुलेन्सको सेवा अझ बढी राम्रो बनाउने। Improve the ambulance service  
 एम्बुलेन्सको शुल्क घटाउने Reduce the ambulance charge.  
 अस्पतालको कर्मचारीलाई सुलभ रूपले कुरा गर्न पाउनु परयो। स्वयम सेविका संगै आउनु परयो Have FCHVs accompany mother to the hospital.  
 अन्य I don't know/others \_\_\_\_\_

**QUALITY OF CARE RECEIVED**

15. तपाइलाई सुरक्षित प्रसुतीसेवा को लागि कुन कुरा आवश्यक जस्तो लाग्छ। **What do you think is required for a safe delivery?**

**OPTIONS**

16. तपाइ प्रसुती कहाँ हुने निर्णय लिनको लागि गोपनियता एउटा कारण थियो **Was lack of privacy factor for deciding where to deliver?**

- मुख्य बाधक Major Barrier  
 सामान्य बाधक Minor Barrier  
 बाधक थिएन No Barrier  
 खैअन्य छैन I don't know/Other \_\_\_\_\_

17. तपाइ प्रसुती कहाँ हुने निर्णय लिनको लागि सेवा दिन डाक्टर छ की छैन भनेर बाधक भएको थियो **Was concern about treatment by medical staff a factor deciding where to deliver?**

- मुख्य बाधक Major Barrier  
 सामान्य बाधक Minor Barrier  
 बाधक थिएन No Barrier  
 खैअन्य छैन I don't know/Other \_\_\_\_\_

18. तपाइलाई सुरक्षित प्रसुती सेवा दिनको लागि तपाइ प्रसुती भएको ठाउमा प्रयाप्त कर्मचारी थिए। **Did where you deliver have adequate staff to provide you a safe delivery?**

- प्रयाप्त Adequate  
 प्रयाप्त थिएन किन Not adequate, why? \_\_\_\_\_  
 खैअन्य I don't know/Other \_\_\_\_\_

19. तपाइलाई सुरक्षित प्रसुती सेवा दिनको लागि तपाइ प्रसुती भएको ठाउमा प्रयाप्त आवश्यक सामग्री थिए। **Did where you deliver have adequate supplies to provide you a safe delivery?**

- प्रयाप्त Adequate  
 प्रयाप्त थिएन किन Not adequate, why? \_\_\_\_\_  
 खैअन्य I don't know/Other \_\_\_\_\_

20. तपाइलाई सुरक्षित प्रसुती सेवा दिनको लागि तपाइ प्रसुती भएको ठाउमा प्रयाप्त आवश्यक ठाउ थियो **Did where you deliver have adequate space to provide you a safe delivery?**

- प्रयाप्त Adequate  
 प्रयाप्त थिएन किन Not adequate, why? \_\_\_\_\_  
 खैअन्य I don't know/Other \_\_\_\_\_

21. तपाइ प्रसुती भएको वेला तपाइ लाइ कही कुराको कमी थियो जस्तो लाग्छ। **What was lacking at the place of delivery during your delivery?**

- गोपनियताको कमी Lack of privacy  
 दक्ष जनशक्ति को कमी(डाक्टर,नर्स) Lack of skilled manpower  
 सफा ठाउ थिएन Lack of clean space  
 आवश्यक खाट थिएन। Lack of sufficient beds  
 अन्य Others \_\_\_\_\_  
 Nothing

22. तपाइले पाएको प्रसुती सेवामा के तपाइ सन्तुष्टी हुनुहुन्छ। **Were you satisfied with the care that you received for your delivery?**

- सन्तुष्टी Satisfied  
 असन्तुष्टी किन Dissatisfied, why? \_\_\_\_\_  
 खैअन्य I don't know/Other \_\_\_\_\_

23. तपाइले पाएको तुरुन्त सुत्केरी सेवामा के तपाइ सन्तुष्टी हुनुहुन्छ। **Were you satisfied with immediate post-partum care you received?**

- सन्तुष्टी Satisfied  
 असन्तुष्टी किन Dissatisfied, why? \_\_\_\_\_  
 खैअन्य I don't know/Other \_\_\_\_\_

**THANK YOU FOR YOUR PARTICIPATION!**
